# Supplementary material for: Preterm birth, birth weight, infant weight gain and their associations with childhood asthma and spirometry: a cross-sectional observational study in Nairobi, Kenya
Source: PubMed Central journal article supplement (PMC10514609; doi:10.1136/bmjresp-2023-001895), 2023-09-21
Supplement: bmjresp-2023-001895supp001.pdf [file bmjresp-2023-001895supp001.pdf]

## **Supplemental Material**

### **Preterm birth, birth weight, infant weight gain and their associations with childhood asthma and spirometry: a cross-sectional observational study in Nairobi, Kenya.**

Meme H, Amukoye E, Bowyer C, Chakaya J, Dobson R, Fuld J, et al

**Questions reported in the manuscript.**

1. In the home where this child lives is there
  2. electricity, (Y, N)
  3. a television, (Y, N)
  4. a cell phone, (Y, N)
  5. a refrigerator, (Y, N)
  6. an indoor bath or shower, (Y, N)
  7. an indoor tap, (Y, N)
  8. a flush toilet, (Y, N)
  9. a washing machine, (Y, N)
  10. a landline telephone. (Y, N)
  11. Does the family own a car (Y, N)
12. Has this child had wheezing or whistling in the chest in the past 12 months? (Y / N /DK)
13. Has this child ever had asthma? (Y / N /DK)
14. Was this child's asthma confirmed by a doctor? (Y / N /DK)
15. In the past 12 months, has this child had a dry cough at night, apart from a cough associated with a cold or chest infection? (Y / N /DK)
16. Does this child ever have trouble with his/her breathing? (never, only rarely, repeatedly, but it always gets completely better, continuously, so that breathing is never quite right)
17. Was this child born prematurely (more than 3 weeks before he/she was expected)? (Y / N /DK)
18. How close is your child's home to a major road? (a road that has lorries and/or regular buses/minibuses) (<100m, 100-500m, >500 m)
19. Does anyone smoke cigarettes or tobacco inside the building where your child sleeps? (Y / N /DK)
20. In your child's everyday life, does he/she breathe in vapours, dusts, gases or fumes for more than 15 hours per week? (Y / N /DK)
21. Is there ever a fire to burn refuse (waste, rubbish) within sight of your home? (Y / N /DK)
22. Do you burn mosquito coils at home? (Y / N /DK)

Table S1: Socio-economic, environmental, respiratory symptom, and lung function characteristics of participating children attending schools in Mukuru and Buruburu

|                                                                                              | Buruburu<br>(n=1096) | Mukuru<br>(n=1277)    | Combined<br>(n=2373) |
|----------------------------------------------------------------------------------------------|----------------------|-----------------------|----------------------|
| Girls (n, %)                                                                                 | 567 (51.7%)          | 673 (52.7%)           | 1240 (52.3%)         |
| Age (median, IQR)                                                                            | 10 (8-12)            | 11 (9-13)             | 10 (8-13)            |
| Household assets owned (median, IQR)                                                         | 6 (3-7)              | 3 (2-3)               | 3 (3-6)              |
| Estimated 24-hour time weighted average PM <sub>2.5</sub> (µg/m <sup>3</sup> ) mean (95% CI) | 22.3 (22.1, 22.5)    | 39.9 (39.5, 40.2)     | 31.7 (31.3, 32.2)    |
| Exposed vapours, dusts, gases, fumes >15hrs/week (n, %)*                                     | 565 (54.6%)          | 815 (70.3%)           | 1380 (62.9%)         |
| Refuse burnt within sight of home (n, %)                                                     | 330 (30.2%)          | 485 (38.1%)           | 815 (34.5%)          |
| Proximity of home to major road (n, %)                                                       |                      |                       |                      |
| <100m                                                                                        | 569 (51.9%)          | 554 (43.4%)           | 1123 (47.3%)         |
| 100-500m                                                                                     | 397 (36.2%)          | 398 (31.2%)           | 795 (33.5%)          |
| >500m                                                                                        | 130 (11.9%)          | 325 (25.5%)           | 455 (19.2%)          |
| Smoker in the home (n, %)                                                                    | 90 (8.2%)            | 159 (12.5%)           | 249 (10.5%)          |
| Burn mosquito coils in home (n, %)                                                           | 197 (18.0%)          | 342 (26.8%)           | 539 (22.7%)          |
|                                                                                              |                      |                       |                      |
| <b>Symptoms</b>                                                                              |                      |                       |                      |
| Wheeze in last 12 months (n, %)                                                              | 70 (6.4%)            | 120 (9.5%)            | 190 (8.1%)           |
| Trouble with breathing (n, %)                                                                | 138 (12.6%)          | 208 (16.3%)           | 346 (14.6%)          |
| Dry cough at night in past 12 months (n, %)                                                  | 135 (12.4%)          | 152 (12.0%)           | 287 (12.2%)          |
| Child ever had asthma (n, %)                                                                 | 33 (3.0%)            | 16 (1.3%)             | 49 (2.1%)            |
| Asthma inhalers                                                                              | 17 (1.6%)            | 4 (0.3%)              | 21 (0.9%)            |
|                                                                                              |                      |                       |                      |
| <b>Spirometry</b>                                                                            | Buruburu (n=750)     | Mukuru (n=872)        | Combined (n=1622)    |
| FEV <sub>1</sub> z-score mean (95% CI)                                                       | 0.289 (0.214, 0.363) | 0.341 (0.270, 0.412)  | 0.317 (0.266, 0.368) |
| FVC z-score mean (95% CI)                                                                    | 0.238 (0.167, 0.308) | 0.322 (0.252, 0.391)  | 0.283 (0.233, 0.332) |
| FEV <sub>1</sub> /FVC z-score mean (95% CI)                                                  | 0.075 (0.004, 0.146) | 0.027 (-0.034, 0.089) | 0.049 (0.003, 0.096) |

The questions asked are documented in supplemental file

CI confidence interval
